# Supplementary material for: Preparation of temperature sensitive molecularly imprinted polymer coatings on nickel foam for determination of ofloxacin in Yellow River water by solid-phase microextraction
Source: Royal Society of Chemistry journal article supplement (doi:10.1039/c5ra15031k), 2015-01-01
Supplement: c5ra15031k1.pdf [file c5ra15031k1.pdf]

1 **Supporting Information**

2 **Preparation of temperature sensitive molecularly imprinted**  
3 **polymer coatings on nickel foam for determination of**  
4 **ofloxacin in Yellow River water by solid-phase**  
5 **microextraction**

6

7 Xiujuan Guan, Xinyue Zhu, Bianfei Yu, Tong Zhao, Haixia Zhang\*

8

9 State Key Laboratory of Applied Organic Chemistry, College of Chemistry and  
10 Chemical Engineering, Lanzhou University, Lanzhou 730000, China

11

12

13

14 \*Corresponding author: Haixia Zhang

15 Tel.: +86 931 8912058;

16 Fax: +86 931 8912582.

17 E-mail: zhanghx@lzu.edu.cn

18

19

20

21

22

23

# Contents

|    |                                                                                          |
|----|------------------------------------------------------------------------------------------|
| 1  |                                                                                          |
| 2  | <b>1. Structures of compounds studied in the work</b>                                    |
| 3  | <b>2. Pictures of original NF (1), D- NF (2), MIP-NF (3) and NIP-NF (4) in synthesis</b> |
| 4  | <b>procedure</b>                                                                         |
| 5  | <b>3. IR spectra of NIP (a) and MIP (b) materials</b>                                    |
| 6  | <b>4. Thermogravimetric curves of MIP and NIP.</b>                                       |
| 7  | <b>5. Photos of MIP-NF(M) and NIP-NF(N) after static adsorption of ENR or RhB</b>        |
| 8  | <b>under ultraviolet light or natural light</b>                                          |
| 9  | <b>6. Elemental analysis of NIP and MIP</b>                                              |
| 10 | <b>7. Pore structure parameters of MIP and NIP</b>                                       |
| 11 | <b>8. The adsorption and desorption quantity of temperature sensitive experiment</b>     |
| 12 | <b>9. Parameters of Langmuir and Freundlich equations</b>                                |
| 13 |                                                                                          |
| 14 |                                                                                          |
| 15 |                                                                                          |
| 16 |                                                                                          |
| 17 |                                                                                          |
| 18 |                                                                                          |
| 19 |                                                                                          |
| 20 |                                                                                          |
| 21 |                                                                                          |
| 22 |                                                                                          |

1

## 2 1. Structures of compounds studied in the work

3

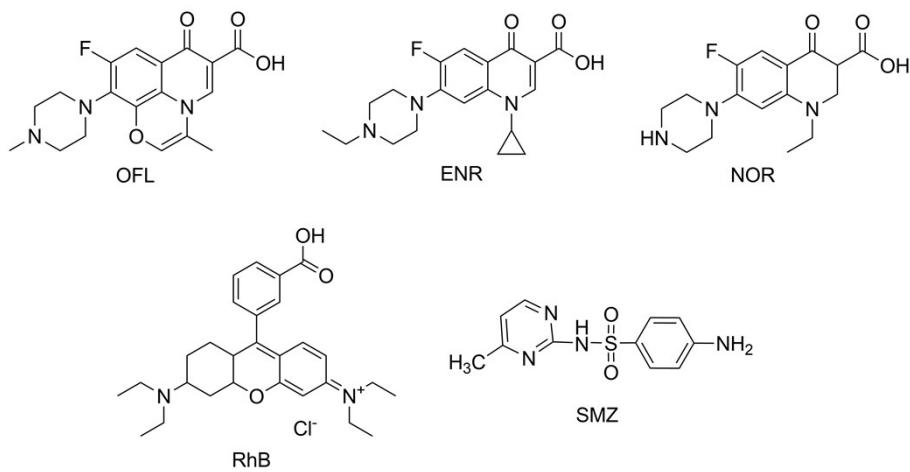

4

5

Fig.S1. Structures of compounds studied in the work

6

## 7 2. Pictures of original NF (1), D- NF (2), MIP-NF (3), NIP-NF (4).

8

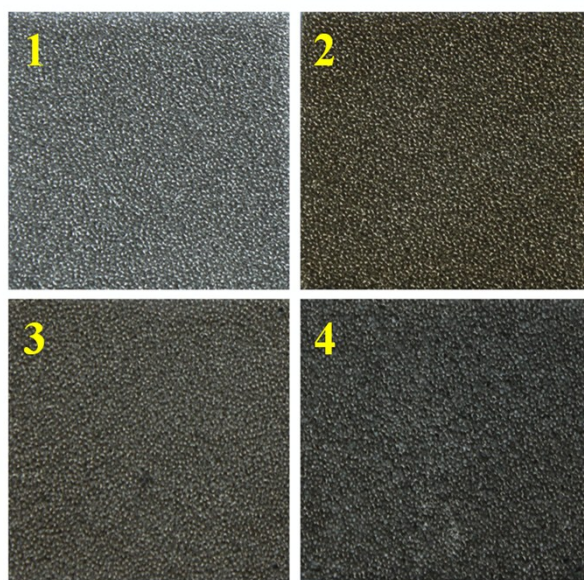

9

10 Fig.S2. Pictures of original NF (1), D- NF (2), MIP-NF (3), NIP-NF (4).

11

### 1 3. IR spectra of NIP (a) and MIP (b) materials

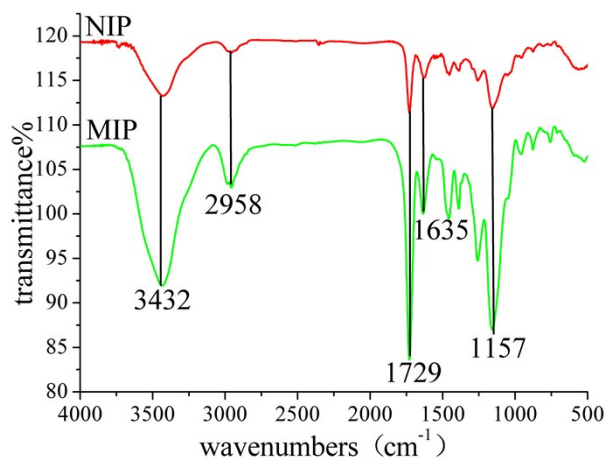

2

3

Fig.S3. IR spectra of NIP and MIP materials.

4 1157 cm<sup>-1</sup> is the asymmetric stretching vibration peak of Si-O-Si and 1635 cm<sup>-1</sup>  
5 is the vibration peak of C=C. 1729 cm<sup>-1</sup> is the vibration peak of C=O of EGDMA and  
6 2958 cm<sup>-1</sup> is the characteristic absorption peak of C-H. The transmittance at 3432 cm<sup>-1</sup>  
7 shows that materials have abundant hydroxyl groups after dopamine modified. The  
8 presence of above characteristic absorption peaks proved that the synthesis of MIP  
9 was successful.

### 10 4. Thermogravimetric curves of MIP and NIP.

11

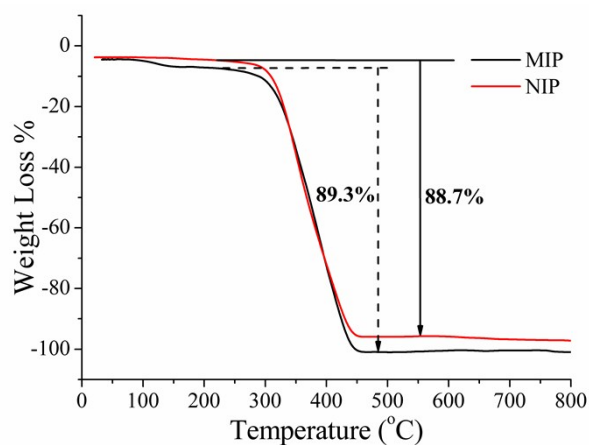

12

13

Fig.S4. Thermogravimetric curves of MIP and NIP.

1

2 **5. Photos of MIP-NF(M) and NIP-NF(N) after static adsorption of ENR or RhB**  
3 **under ultraviolet light or natural light.**

4

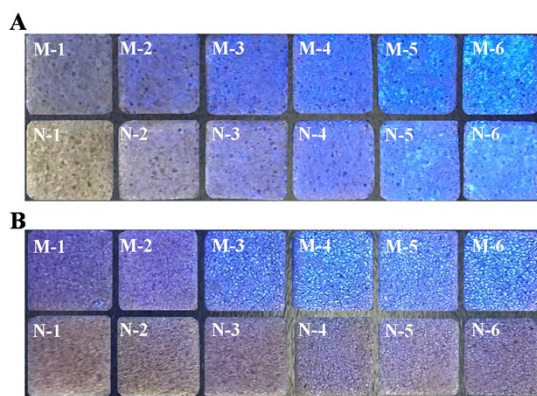

5

6 Fig.S5. Photos of MIP-NF(M) and NIP-NF(N) after static adsorption of ENR for 24 h (A) and in  
7 air for another 12 h (B) under ultraviolet lamp.

8 Conditions: adsorption temperature: 25°C; samples: 10 mL ENR aqueous solutions with different  
9 concentrations (1-6 were 5, 10, 20,40, 80, 100  $\mu\text{g mL}^{-1}$ , respectively).

10

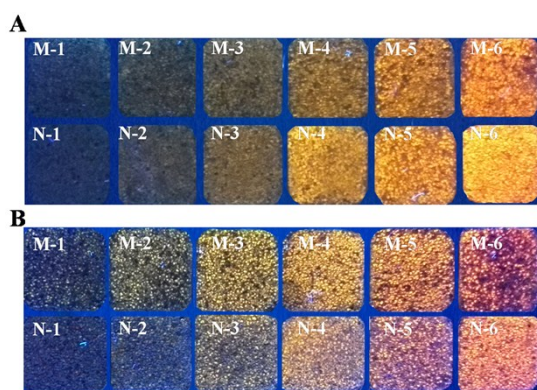

11

12 Fig.S6. Photos of MIP -NF(M) and NIP-NF (N) after static adsorption of RhB for 24 h (A) and in  
13 air for another 12 h (B) under ultraviolet lamp.

14 Conditions: adsorption temperature: 25°C; samples: 10 mL RhB aqueous solutions with different  
15 concentrations (1-6 were 0.1, 0.2, 0.5,1, 2, 4  $\mu\text{g mL}^{-1}$ , respectively).

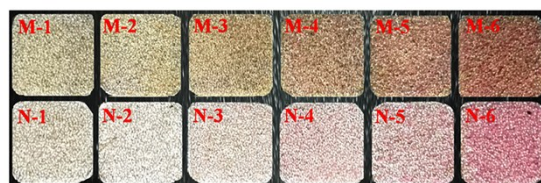

1  
2 Fig.S7. Photos of MIP –NF (M) and NIP-NF (N) after static adsorption of RhB for 24 h under  
3 natural light  
4 Conditions: same as Fig.S6.  
5

## 6 6. Elemental analysis of NIP and MIP.

7 Table S1 Elemental analysis of NIP and MIP (n=2)

| Sample           | N (%) | Average | C (%) | Average | H (%) | Average |
|------------------|-------|---------|-------|---------|-------|---------|
| NIP              | 0.34  | 0.36    | 48.00 | 48.11   | 6.839 | 6.908   |
|                  | 0.35  |         | 48.21 |         | 6.977 |         |
| MIP <sup>1</sup> | 0.68  | 0.65    | 52.51 | 52.56   | 6.673 | 6.646   |
|                  | 0.61  |         | 52.60 |         | 6.619 |         |
| MIP <sup>2</sup> | 0.38  | 0.36    | 47.78 | 47.81   | 6.778 | 6.849   |
|                  | 0.35  |         | 47.83 |         | 6.919 |         |

8 <sup>1</sup> and <sup>2</sup> meant before and after removal of template molecules, respectively.

## 9 7. Pore structure parameters of MIP and NIP.

10

11 Table S2 Pore structure parameters of MIP and NIP

| Sample | $S_{\text{BET}}$ ( $\text{m}^2\text{g}^{-1}$ ) | $V_{\text{BJH}}$ ( $\text{cm}^3\text{g}^{-1}$ ) |            | $D_{\text{BJH}}$ (nm) |            |
|--------|------------------------------------------------|-------------------------------------------------|------------|-----------------------|------------|
|        |                                                | Adsorption                                      | Desorption | Adsorption            | Desorption |
| MIP    | 13.0757                                        | 0.0461                                          | 0.0464     | 16.2100               | 14.8069    |
| NIP    | 0.3893                                         | 0.0010                                          | 0.0012     | 7.8233                | 7.9747     |

12

## 13 8. The adsorption and desorption quantity of temperature sensitive experiment

1

2 Table S3 The adsorption and desorption quantity on MIP-NF at different temperature

| Temperature (°C)                             | 25    | 35    | 45    |
|----------------------------------------------|-------|-------|-------|
| Adsorption quantity ( $\mu\text{g g}^{-1}$ ) | 280.2 | 235.1 | 213.1 |
| Desorption quantity( $\mu\text{g g}^{-1}$ )  | 36.91 | 43.56 | 63.89 |

3

#### 4 9. Parameters of Langmuir and Freundlich equations

5

6 Table S4 Parameters of Langmuir and Freundlich equations

| Material | Langmuir |            |        | Freundlich |       |        |
|----------|----------|------------|--------|------------|-------|--------|
|          | $K_L$    | $Q_{\max}$ | $R^2$  | $K_f$      | n     | $R^2$  |
| MIP      | 0.0558   | 666.7      | 0.9912 | 0.8550     | 1.059 | 0.9527 |
| NIP      | 0.1094   | 628.9      | 0.9926 | 0.9335     | 1.026 | 0.9761 |

7  $K_L$  is Langmuir adsorption constants.  $K_F$  is Freundlich adsorption constant and  $1/n$  is the

8 adsorption index indicating adsorption strength.
